# Supplementary material
Source: PubMed Central journal article supplement (PMC3500048)
Supplement: supp_cvs275_cvs275supp.pdf [file supp_cvs275_cvs275supp.pdf]

|                                                                                                                                         | Young WT |         | Middle Age WT |         | Old WT  |         | Senescent WT |         |
|-----------------------------------------------------------------------------------------------------------------------------------------|----------|---------|---------------|---------|---------|---------|--------------|---------|
|                                                                                                                                         | Average  | SD      | Average       | SD      | Average | SD      | Average      | SD      |
| Adamts1                                                                                                                                 | 0.10677  | 0.03312 | 0.14537       | 0.01492 | 0.12606 | 0.05223 | 0.11346      | 0.04254 |
| Adamts2                                                                                                                                 | 0.05086  | 0.01103 | 0.05155       | 0.01061 | 0.04392 | 0.00454 | 0.04966      | 0.01057 |
| Adamts5                                                                                                                                 | 0.01409  | 0.00355 | 0.01684       | 0.00258 | 0.01383 | 0.00560 | 0.01694      | 0.00424 |
| Adamts8                                                                                                                                 | 0.00269  | 0.00097 | 0.00301       | 0.00099 | 0.00305 | 0.00049 | 0.00288      | 0.00112 |
| Ctnna1                                                                                                                                  | 1.08433  | 0.12489 | 1.10873       | 0.07852 | 0.98405 | 0.04017 | 1.24303      | 0.19087 |
| Ctnna2                                                                                                                                  | 0.00016  | 0.00009 | 0.00005       | 0.00003 | 0.00013 | 0.00008 | 0.00019      | 0.00011 |
| Ctnnb1                                                                                                                                  | 0.58410  | 0.06059 | 0.55252       | 0.07022 | 0.58495 | 0.03613 | 0.58175      | 0.07938 |
| Cd44                                                                                                                                    | 0.03411  | 0.01273 | 0.03773       | 0.00446 | 0.03485 | 0.00565 | 0.03309      | 0.00780 |
| Cdh1                                                                                                                                    | 0.00019  | 0.00007 | 0.00024       | 0.00019 | 0.00029 | 0.00013 | 0.00018      | 0.00003 |
| Cdh2                                                                                                                                    | 1.21291  | 0.28340 | 1.46589       | 0.12879 | 1.48481 | 0.18815 | 1.63377      | 0.29226 |
| Cdh4                                                                                                                                    | 0.00787  | 0.00055 | 0.00868       | 0.00139 | 0.01038 | 0.00163 | 0.01065      | 0.00278 |
| Cntn1                                                                                                                                   | 0.00028  | 0.00016 | 0.00011       | 0.00006 | 0.00016 | 0.00008 | 0.00020      | 0.00011 |
| Col1a1                                                                                                                                  | 0.12388  | 0.03591 | 0.06678       | 0.02616 | 0.08605 | 0.01338 | 0.07944      | 0.03759 |
| Col2a1                                                                                                                                  | 0.00018  | 0.00008 | 0.00011       | 0.00005 | 0.00015 | 0.00008 | 0.00017      | 0.00010 |
| Col3a1                                                                                                                                  | 0.76854  | 0.17520 | 0.69917       | 0.28347 | 0.58075 | 0.15312 | 0.55636      | 0.26284 |
| Col4a1                                                                                                                                  | 0.45574  | 0.12191 | 0.43743       | 0.11215 | 0.36399 | 0.03742 | 0.35028      | 0.10688 |
| Col4a2                                                                                                                                  | 0.36422  | 0.10011 | 0.43406       | 0.11300 | 0.32587 | 0.04421 | 0.34524      | 0.09061 |
| Col4a3                                                                                                                                  | 0.00355  | 0.00115 | 0.00297       | 0.00084 | 0.00337 | 0.00041 | 0.00352      | 0.00046 |
| Col5a1                                                                                                                                  | 0.04138  | 0.01076 | 0.03370       | 0.00820 | 0.03696 | 0.00391 | 0.03713      | 0.00859 |
| Col6a1                                                                                                                                  | 0.09839  | 0.03141 | 0.10398       | 0.02181 | 0.08425 | 0.00608 | 0.08762      | 0.02077 |
| Vcan                                                                                                                                    | 0.03892  | 0.01392 | 0.02594       | 0.00487 | 0.03593 | 0.00872 | 0.03475      | 0.01062 |
| Ctgf                                                                                                                                    | 0.68675  | 0.23880 | 0.56795       | 0.14891 | 0.62019 | 0.13273 | 1.07832      | 0.31576 |
| Ecm1                                                                                                                                    | 0.08948  | 0.01370 | 0.11559       | 0.01538 | 0.09473 | 0.03422 | 0.11740      | 0.03118 |
| Emilin1                                                                                                                                 | 0.03372  | 0.00869 | 0.03066       | 0.00585 | 0.03083 | 0.00583 | 0.03266      | 0.00824 |
| Entpd1                                                                                                                                  | 0.03267  | 0.00347 | 0.02065       | 0.00183 | 0.02876 | 0.00855 | 0.03568      | 0.00674 |
| Fbln1                                                                                                                                   | 0.04566  | 0.00721 | 0.03668       | 0.01106 | 0.03693 | 0.00406 | 0.03685      | 0.01129 |
| <td>0.04940</td> <td>0.01071</td> <td>0.04624</td> <td>0.01089</td> <td>0.04890</td> <td>0.00893</td> <td>0.04519</td> <td>0.00868</td> | 0.04940  | 0.01071 | 0.04624       | 0.01089 | 0.04890 | 0.00893 | 0.04519      | 0.00868 |
| Hapln1                                                                                                                                  | 0.00049  | 0.00032 | 0.00077       | 0.00039 | 0.00041 | 0.00020 | 0.00038      | 0.00039 |
| Hc                                                                                                                                      | 0.00020  | 0.00008 | 0.00017       | 0.00014 | 0.00022 | 0.00004 | 0.00018      | 0.00012 |
| Icam1                                                                                                                                   | 0.03521  | 0.00793 | 0.04514       | 0.00780 | 0.05058 | 0.00836 | 0.04663      | 0.00946 |
| Itga2                                                                                                                                   | 0.00267  | 0.00054 | 0.00183       | 0.00039 | 0.00268 | 0.00033 | 0.00227      | 0.00026 |
| Itga3                                                                                                                                   | 0.00845  | 0.00074 | 0.00713       | 0.00107 | 0.00748 | 0.00138 | 0.00734      | 0.00146 |
| Itga4                                                                                                                                   | 0.00093  | 0.00031 | 0.00110       | 0.00033 | 0.00147 | 0.00058 | 0.00128      | 0.00024 |
| Itga5                                                                                                                                   | 0.05558  | 0.01768 | 0.03907       | 0.00568 | 0.04701 | 0.01306 | 0.05506      | 0.01433 |
| Itgae                                                                                                                                   | 0.00070  | 0.00037 | 0.00063       | 0.00037 | 0.00101 | 0.00037 | 0.00092      | 0.00034 |
| Itgal                                                                                                                                   | 0.00264  | 0.00038 | 0.00349       | 0.00093 | 0.00587 | 0.00375 | 0.00356      | 0.00113 |
| Itgam                                                                                                                                   | 0.01672  | 0.00312 | 0.01460       | 0.00206 | 0.02101 | 0.00341 | 0.01999      | 0.00482 |
| Itgav                                                                                                                                   | 0.08185  | 0.01050 | 0.06092       | 0.00396 | 0.08005 | 0.01016 | 0.07673      | 0.00837 |
| Itgax                                                                                                                                   | 0.00142  | 0.00037 | 0.00206       | 0.00067 | 0.00285 | 0.00080 | 0.00202      | 0.00066 |
| Itgb1                                                                                                                                   | 0.91262  | 0.11217 | 0.85322       | 0.07371 | 0.94940 | 0.04976 | 0.96713      | 0.09430 |
| Itgb2                                                                                                                                   | 0.01440  | 0.00196 | 0.01968       | 0.00359 | 0.02257 | 0.00394 | 0.02098      | 0.00429 |
| Itgb3                                                                                                                                   | 0.00555  | 0.00185 | 0.00378       | 0.00048 | 0.00630 | 0.00285 | 0.00699      | 0.00156 |
| Itgb4                                                                                                                                   | 0.00034  | 0.00011 | 0.00040       | 0.00006 | 0.00035 | 0.00014 | 0.00039      | 0.00006 |

|                                                                                    | Young WT |         | Middle Age WT |         | Old WT  |         | Senescent WT |         |
|------------------------------------------------------------------------------------|----------|---------|---------------|---------|---------|---------|--------------|---------|
|                                                                                    | Average  | SD      | Average       | SD      | Average | SD      | Average      | SD      |
| Lama1                                                                              | 0.00025  | 0.00014 | 0.00013       | 0.00005 | 0.00019 | 0.00006 | 0.00022      | 0.00007 |
| Lama2                                                                              | 0.08323  | 0.01220 | 0.10155       | 0.01125 | 0.09032 | 0.01763 | 0.09725      | 0.01833 |
| Lama3                                                                              | 0.00377  | 0.00079 | 0.00351       | 0.00053 | 0.00327 | 0.00041 | 0.00328      | 0.00049 |
| Lamb2                                                                              | 0.24378  | 0.03199 | 0.27200       | 0.01756 | 0.22822 | 0.02189 | 0.24811      | 0.03892 |
| Lamb3                                                                              | 0.00811  | 0.00094 | 0.01126       | 0.00098 | 0.00962 | 0.00091 | 0.00977      | 0.00224 |
| Lamc1                                                                              | 0.12182  | 0.00992 | 0.15657       | 0.02869 | 0.13572 | 0.01744 | 0.11536      | 0.01844 |
| Mmp11                                                                              | 0.00025  | 0.00014 | 0.00035       | 0.00007 | 0.00037 | 0.00012 | 0.00063      | 0.00015 |
| Mmp12                                                                              | 0.00024  | 0.00013 | 0.00007       | 0.00006 | 0.00017 | 0.00008 | 0.00025      | 0.00014 |
| Mmp13                                                                              | 0.00245  | 0.00072 | 0.00235       | 0.00081 | 0.00232 | 0.00097 | 0.00184      | 0.00085 |
| Mmp14                                                                              | 0.01644  | 0.00532 | 0.01440       | 0.00457 | 0.02036 | 0.00299 | 0.02315      | 0.00514 |
| Mmp15                                                                              | 0.14915  | 0.01858 | 0.10626       | 0.01858 | 0.13173 | 0.02255 | 0.12244      | 0.03226 |
| Mmp1a                                                                              | 0.00015  | 0.00010 | 0.00004       | 0.00001 | 0.00013 | 0.00011 | 0.00015      | 0.00009 |
| Mmp2                                                                               | 0.11611  | 0.01578 | 0.13598       | 0.02287 | 0.12741 | 0.00871 | 0.12882      | 0.02125 |
| Mmp3                                                                               | 0.01874  | 0.00375 | 0.01755       | 0.00792 | 0.02654 | 0.00735 | 0.03856      | 0.01201 |
| Mmp7                                                                               | 0.00010  | 0.00004 | 0.00006       | 0.00002 | 0.00005 | 0.00006 | 0.00008      | 0.00006 |
| Mmp8                                                                               | 0.00037  | 0.00016 | 0.00039       | 0.00045 | 0.00048 | 0.00028 | 0.00100      | 0.00056 |
| Mmp9                                                                               | 0.00155  | 0.00051 | 0.00129       | 0.00027 | 0.00273 | 0.00122 | 0.00284      | 0.00043 |
| Ncam1                                                                              | 0.00531  | 0.00092 | 0.00388       | 0.00053 | 0.00430 | 0.00090 | 0.00507      | 0.00155 |
| Pecam1                                                                             | 0.34424  | 0.04861 | 0.33075       | 0.04092 | 0.36144 | 0.03872 | 0.37168      | 0.04198 |
| Postn                                                                              | 0.04609  | 0.01251 | 0.07378       | 0.03033 | 0.08808 | 0.02804 | 0.08501      | 0.03664 |
| Sele                                                                               | 0.00687  | 0.00251 | 0.00904       | 0.00331 | 0.00888 | 0.00153 | 0.00802      | 0.00331 |
| Sell                                                                               | 0.00261  | 0.00067 | 0.00196       | 0.00047 | 0.00364 | 0.00203 | 0.00315      | 0.00084 |
| Selp                                                                               | 0.00276  | 0.00078 | 0.00298       | 0.00057 | 0.00352 | 0.00087 | 0.00402      | 0.00061 |
| Sgce                                                                               | 0.02947  | 0.00504 | 0.03059       | 0.00330 | 0.02477 | 0.00408 | 0.03824      | 0.01289 |
| Sparc                                                                              | 0.48865  | 0.12111 | 0.38318       | 0.11593 | 0.36238 | 0.03537 | 0.38912      | 0.10403 |
| Spock1                                                                             | 0.00011  | 0.00008 | 0.00002       | 0.00004 | 0.00004 | 0.00003 | 0.00003      | 0.00003 |
| Spp1                                                                               | 0.00819  | 0.00419 | 0.00859       | 0.00376 | 0.00713 | 0.00306 | 0.00540      | 0.00265 |
| Syt1                                                                               | 0.00013  | 0.00009 | 0.00005       | 0.00002 | 0.00007 | 0.00005 | 0.00011      | 0.00007 |
| Tgfb1                                                                              | 0.12486  | 0.01490 | 0.16616       | 0.02125 | 0.14991 | 0.01944 | 0.15959      | 0.03031 |
| Thbs1                                                                              | 0.11290  | 0.06585 | 0.09611       | 0.03060 | 0.15177 | 0.12745 | 0.15630      | 0.15542 |
| Thbs2                                                                              | 0.07284  | 0.01027 | 0.08372       | 0.01626 | 0.07924 | 0.00615 | 0.10533      | 0.04755 |
| Thbs3                                                                              | 0.01061  | 0.00216 | 0.01018       | 0.00117 | 0.00949 | 0.00105 | 0.00995      | 0.00211 |
| Timp1                                                                              | 0.00004  | 0.00002 | 0.00004       | 0.00001 | 0.00005 | 0.00002 | 0.00004      | 0.00001 |
| Timp2                                                                              | 0.18372  | 0.03392 | 0.16858       | 0.01419 | 0.17285 | 0.02992 | 0.20594      | 0.04761 |
| Timp3                                                                              | 0.17123  | 0.05390 | 0.19993       | 0.01649 | 0.22719 | 0.07935 | 0.23941      | 0.09148 |
| Tnc                                                                                | 0.00169  | 0.00078 | 0.00183       | 0.00121 | 0.00199 | 0.00048 | 0.00221      | 0.00085 |
| Vcam1                                                                              | 0.04467  | 0.00939 | 0.06009       | 0.01537 | 0.05569 | 0.01124 | 0.05988      | 0.01230 |
| Vtn                                                                                | 0.11768  | 0.02294 | 0.10098       | 0.02002 | 0.10732 | 0.01921 | 0.11474      | 0.01444 |
|                                                                                    |          |         |               |         |         |         |              |         |
|                                                                                    |          |         |               |         |         |         |              |         |
| <b>Values are 2<sup>-ΔCt</sup> levels, normalized to all 5 housekeeping genes.</b> |          |         |               |         |         |         |              |         |

|                                                                                                                                         | Young Null |         | Middle Age Null |         | Old Null |         | Senescent Null |         |
|-----------------------------------------------------------------------------------------------------------------------------------------|------------|---------|-----------------|---------|----------|---------|----------------|---------|
|                                                                                                                                         | Average    | SD      | Average         | SD      | Average  | SD      | Average        | SD      |
| Adamts1                                                                                                                                 | 0.12907    | 0.07428 | 0.18344         | 0.05349 | 0.12943  | 0.05357 | 0.09402        | 0.02743 |
| Adamts2                                                                                                                                 | 0.04106    | 0.00675 | 0.04653         | 0.00986 | 0.04829  | 0.00551 | 0.04774        | 0.01508 |
| Adamts5                                                                                                                                 | 0.01763    | 0.00401 | 0.02007         | 0.00483 | 0.01793  | 0.00545 | 0.01610        | 0.00204 |
| Adamts8                                                                                                                                 | 0.00178    | 0.00037 | 0.00191         | 0.00080 | 0.00273  | 0.00097 | 0.00272        | 0.00134 |
| Ctnna1                                                                                                                                  | 1.17472    | 0.09863 | 1.12594         | 0.08821 | 1.05629  | 0.05949 | 1.31495        | 0.10905 |
| Ctnna2                                                                                                                                  | 0.00015    | 0.00009 | 0.00007         | 0.00005 | 0.00012  | 0.00004 | 0.00022        | 0.00017 |
| Ctnnb1                                                                                                                                  | 0.59101    | 0.08530 | 0.48875         | 0.05476 | 0.57139  | 0.01726 | 0.57602        | 0.03535 |
| Cd44                                                                                                                                    | 0.04533    | 0.00506 | 0.04330         | 0.00462 | 0.03749  | 0.00473 | 0.03927        | 0.01098 |
| Cdh1                                                                                                                                    | 0.00042    | 0.00027 | 0.00024         | 0.00013 | 0.00022  | 0.00012 | 0.00024        | 0.00015 |
| Cdh2                                                                                                                                    | 1.40423    | 0.24132 | 1.44537         | 0.20395 | 1.41365  | 0.22718 | 1.53207        | 0.22353 |
| Cdh4                                                                                                                                    | 0.00632    | 0.00119 | 0.00735         | 0.00051 | 0.00957  | 0.00115 | 0.00874        | 0.00096 |
| Cntn1                                                                                                                                   | 0.00024    | 0.00020 | 0.00011         | 0.00009 | 0.00021  | 0.00011 | 0.00028        | 0.00015 |
| Col1a1                                                                                                                                  | 0.08769    | 0.00801 | 0.04924         | 0.01200 | 0.09924  | 0.03585 | 0.05988        | 0.02686 |
| Col2a1                                                                                                                                  | 0.00018    | 0.00006 | 0.00011         | 0.00005 | 0.00014  | 0.00011 | 0.00026        | 0.00008 |
| Col3a1                                                                                                                                  | 0.88054    | 0.12914 | 0.74273         | 0.15491 | 0.78310  | 0.12645 | 0.37985        | 0.18927 |
| Col4a1                                                                                                                                  | 0.57709    | 0.09443 | 0.47650         | 0.11805 | 0.48740  | 0.10240 | 0.31012        | 0.08492 |
| Col4a2                                                                                                                                  | 0.48771    | 0.08855 | 0.47165         | 0.14251 | 0.44012  | 0.10506 | 0.35056        | 0.09879 |
| Col4a3                                                                                                                                  | 0.00315    | 0.00042 | 0.00271         | 0.00082 | 0.00357  | 0.00091 | 0.00330        | 0.00095 |
| Col5a1                                                                                                                                  | 0.03533    | 0.00552 | 0.02915         | 0.00744 | 0.04069  | 0.00780 | 0.03357        | 0.01024 |
| Col6a1                                                                                                                                  | 0.10240    | 0.00600 | 0.10643         | 0.01129 | 0.10021  | 0.01165 | 0.07862        | 0.03165 |
| Vcan                                                                                                                                    | 0.02804    | 0.00388 | 0.02090         | 0.00207 | 0.03916  | 0.01487 | 0.03597        | 0.01051 |
| Ctgf                                                                                                                                    | 0.59268    | 0.15160 | 0.55100         | 0.11090 | 0.54255  | 0.11444 | 0.79885        | 0.14134 |
| Ecm1                                                                                                                                    | 0.06511    | 0.02309 | 0.10422         | 0.02460 | 0.08949  | 0.01701 | 0.09265        | 0.01784 |
| Emilin1                                                                                                                                 | 0.02967    | 0.00155 | 0.02508         | 0.00579 | 0.03056  | 0.00893 | 0.03173        | 0.01060 |
| Entpd1                                                                                                                                  | 0.02923    | 0.00570 | 0.01963         | 0.00160 | 0.02950  | 0.01488 | 0.03592        | 0.00383 |
| Fbln1                                                                                                                                   | 0.03658    | 0.00612 | 0.03718         | 0.00909 | 0.03465  | 0.00604 | 0.03519        | 0.00398 |
| <td>0.04915</td> <td>0.01232</td> <td>0.04544</td> <td>0.00749</td> <td>0.05463</td> <td>0.01220</td> <td>0.04612</td> <td>0.01518</td> | 0.04915    | 0.01232 | 0.04544         | 0.00749 | 0.05463  | 0.01220 | 0.04612        | 0.01518 |
| Hapln1                                                                                                                                  | 0.00042    | 0.00026 | 0.00048         | 0.00013 | 0.00053  | 0.00034 | 0.00038        | 0.00043 |
| Hc                                                                                                                                      | 0.00236    | 0.00544 | 0.00011         | 0.00006 | 0.00038  | 0.00032 | 0.00018        | 0.00009 |
| Icam1                                                                                                                                   | 0.03879    | 0.00460 | 0.03635         | 0.00498 | 0.04115  | 0.00582 | 0.04616        | 0.00701 |
| Itga2                                                                                                                                   | 0.00238    | 0.00054 | 0.00224         | 0.00046 | 0.00278  | 0.00121 | 0.00266        | 0.00051 |
| Itga3                                                                                                                                   | 0.00677    | 0.00116 | 0.00593         | 0.00099 | 0.00691  | 0.00113 | 0.00687        | 0.00088 |
| Itga4                                                                                                                                   | 0.00133    | 0.00032 | 0.00127         | 0.00015 | 0.00148  | 0.00018 | 0.00141        | 0.00037 |
| Itga5                                                                                                                                   | 0.04285    | 0.00493 | 0.03676         | 0.00330 | 0.04796  | 0.01249 | 0.04919        | 0.00246 |
| Itgae                                                                                                                                   | 0.00156    | 0.00055 | 0.00093         | 0.00052 | 0.00158  | 0.00099 | 0.00082        | 0.00021 |
| Itgal                                                                                                                                   | 0.00433    | 0.00107 | 0.00353         | 0.00091 | 0.00423  | 0.00053 | 0.00459        | 0.00140 |
| Itgam                                                                                                                                   | 0.01485    | 0.00271 | 0.01307         | 0.00218 | 0.01799  | 0.00322 | 0.01868        | 0.00184 |
| Itgav                                                                                                                                   | 0.07864    | 0.01120 | 0.05802         | 0.00697 | 0.07422  | 0.01299 | 0.07785        | 0.01082 |
| Itgax                                                                                                                                   | 0.00350    | 0.00085 | 0.00231         | 0.00075 | 0.00325  | 0.00176 | 0.00190        | 0.00081 |
| Itgb1                                                                                                                                   | 0.92970    | 0.09437 | 0.83488         | 0.07942 | 0.90223  | 0.04831 | 0.88089        | 0.06445 |
| Itgb2                                                                                                                                   | 0.01816    | 0.00368 | 0.02010         | 0.00450 | 0.01766  | 0.00150 | 0.01951        | 0.00259 |
| Itgb3                                                                                                                                   | 0.00503    | 0.00079 | 0.00390         | 0.00021 | 0.00645  | 0.00354 | 0.00929        | 0.00217 |
| Itgb4                                                                                                                                   | 0.00031    | 0.00009 | 0.00032         | 0.00007 | 0.00042  | 0.00007 | 0.00042        | 0.00013 |

|                                                                                    | Young Null                            |         | Middle Age Null |         | Old Null |         | Senescent Null |         |
|------------------------------------------------------------------------------------|---------------------------------------|---------|-----------------|---------|----------|---------|----------------|---------|
|                                                                                    | Average                               | SD      | Average         | SD      | Average  | SD      | Average        | SD      |
| <b>Lama1</b>                                                                       | 0.00041                               | 0.00011 | 0.00016         | 0.00008 | 0.00020  | 0.00008 | 0.00037        | 0.00020 |
| <b>Lama2</b>                                                                       | 0.08393                               | 0.01551 | 0.09897         | 0.00944 | 0.08910  | 0.01799 | 0.08360        | 0.01075 |
| <b>Lama3</b>                                                                       | 0.00332                               | 0.00050 | 0.00388         | 0.00141 | 0.00389  | 0.00077 | 0.00394        | 0.00067 |
| <b>Lamb2</b>                                                                       | 0.23051                               | 0.03823 | 0.27646         | 0.03315 | 0.26341  | 0.02872 | 0.23073        | 0.02135 |
| <b>Lamb3</b>                                                                       | 0.00849                               | 0.00160 | 0.01091         | 0.00135 | 0.01091  | 0.00239 | 0.00959        | 0.00128 |
| <b>Lamc1</b>                                                                       | 0.13138                               | 0.02623 | 0.14123         | 0.02526 | 0.14540  | 0.02447 | 0.11997        | 0.01417 |
| <b>Mmp11</b>                                                                       | 0.00036                               | 0.00027 | 0.00040         | 0.00010 | 0.00051  | 0.00021 | 0.00071        | 0.00021 |
| <b>Mmp12</b>                                                                       | 0.00035                               | 0.00016 | 0.00014         | 0.00008 | 0.00021  | 0.00017 | 0.00034        | 0.00021 |
| <b>Mmp13</b>                                                                       | 0.00686                               | 0.00128 | 0.00386         | 0.00104 | 0.00292  | 0.00129 | 0.00152        | 0.00052 |
| <b>Mmp14</b>                                                                       | 0.02243                               | 0.00338 | 0.01501         | 0.00508 | 0.02614  | 0.00796 | 0.02460        | 0.00426 |
| <b>Mmp15</b>                                                                       | 0.13322                               | 0.00924 | 0.09366         | 0.00583 | 0.12032  | 0.01652 | 0.10773        | 0.00729 |
| <b>Mmp1a</b>                                                                       | 0.00027                               | 0.00017 | 0.00007         | 0.00004 | 0.00012  | 0.00008 | 0.00023        | 0.00015 |
| <b>Mmp2</b>                                                                        | 0.13905                               | 0.01941 | 0.14126         | 0.01313 | 0.14608  | 0.01694 | 0.14070        | 0.03128 |
| <b>Mmp3</b>                                                                        | 0.01447                               | 0.00736 | 0.01445         | 0.00454 | 0.02264  | 0.00505 | 0.03595        | 0.01117 |
| <b>Mmp7</b>                                                                        | 0.00010                               | 0.00007 | 0.00006         | 0.00004 | 0.00005  | 0.00006 | 0.00007        | 0.00004 |
| <b>Mmp8</b>                                                                        | 0.00038                               | 0.00012 | 0.00041         | 0.00023 | 0.00067  | 0.00054 | 0.00228        | 0.00195 |
| <b>Mmp9</b>                                                                        | MMP-9 null mice did not express MMP-9 |         |                 |         |          |         |                |         |
| <b>Ncam1</b>                                                                       | 0.00393                               | 0.00071 | 0.00295         | 0.00057 | 0.00448  | 0.00098 | 0.00609        | 0.00097 |
| <b>Pecam1</b>                                                                      | 0.36192                               | 0.01259 | 0.31725         | 0.02700 | 0.36633  | 0.05478 | 0.37007        | 0.04911 |
| <b>Postn</b>                                                                       | 0.02967                               | 0.00562 | 0.04140         | 0.00632 | 0.05539  | 0.01369 | 0.04411        | 0.02465 |
| <b>Sele</b>                                                                        | 0.01046                               | 0.00379 | 0.00645         | 0.00205 | 0.00627  | 0.00200 | 0.00647        | 0.00302 |
| <b>Sell</b>                                                                        | 0.00257                               | 0.00072 | 0.00174         | 0.00095 | 0.00354  | 0.00191 | 0.00575        | 0.00359 |
| <b>Selp</b>                                                                        | 0.00217                               | 0.00068 | 0.00218         | 0.00074 | 0.00322  | 0.00147 | 0.00439        | 0.00183 |
| <b>Sgce</b>                                                                        | 0.03296                               | 0.00380 | 0.02990         | 0.00228 | 0.02808  | 0.00497 | 0.03655        | 0.00771 |
| <b>Sparc</b>                                                                       | 0.51029                               | 0.10916 | 0.41573         | 0.09327 | 0.49544  | 0.15321 | 0.34698        | 0.10111 |
| <b>Spock1</b>                                                                      | 0.00008                               | 0.00006 | 0.00001         | 0.00001 | 0.00007  | 0.00004 | 0.00006        | 0.00002 |
| <b>Spp1</b>                                                                        | 0.00274                               | 0.00051 | 0.00361         | 0.00132 | 0.00391  | 0.00143 | 0.00514        | 0.00405 |
| <b>Syt1</b>                                                                        | 0.00030                               | 0.00019 | 0.00010         | 0.00010 | 0.00013  | 0.00011 | 0.00020        | 0.00014 |
| <b>Tgfb1</b>                                                                       | 0.10978                               | 0.01696 | 0.13998         | 0.01779 | 0.12691  | 0.02776 | 0.12637        | 0.02396 |
| <b>Thbs1</b>                                                                       | 0.10083                               | 0.04234 | 0.08516         | 0.02856 | 0.15260  | 0.12655 | 0.07856        | 0.04477 |
| <b>Thbs2</b>                                                                       | 0.08287                               | 0.01326 | 0.07942         | 0.01133 | 0.08027  | 0.00765 | 0.11632        | 0.02369 |
| <b>Thbs3</b>                                                                       | 0.00749                               | 0.00159 | 0.00992         | 0.00210 | 0.01000  | 0.00123 | 0.01022        | 0.00204 |
| <b>Timp1</b>                                                                       | 0.00003                               | 0.00002 | 0.00006         | 0.00001 | 0.00004  | 0.00001 | 0.00008        | 0.00003 |
| <b>Timp2</b>                                                                       | 0.18955                               | 0.02435 | 0.16232         | 0.01885 | 0.18909  | 0.05432 | 0.21890        | 0.03825 |
| <b>Timp3</b>                                                                       | 0.12131                               | 0.02771 | 0.19402         | 0.03400 | 0.23949  | 0.09826 | 0.27984        | 0.10420 |
| <b>Tnc</b>                                                                         | 0.00288                               | 0.00067 | 0.00191         | 0.00044 | 0.00318  | 0.00217 | 0.00272        | 0.00102 |
| <b>Vcam1</b>                                                                       | 0.05113                               | 0.00674 | 0.06917         | 0.01304 | 0.05334  | 0.01274 | 0.05775        | 0.01333 |
| <b>Vtn</b>                                                                         | 0.14708                               | 0.02896 | 0.11802         | 0.01776 | 0.11706  | 0.01595 | 0.10343        | 0.02179 |
|                                                                                    |                                       |         |                 |         |          |         |                |         |
| <b>Values are 2<sup>-ΔCt</sup> levels, normalized to all 5 housekeeping genes.</b> |                                       |         |                 |         |          |         |                |         |
